## INSOMNIA AND EARLY ATRIAL FIBRILLATION

1  
2  
3  
4  
5  
6  
7  
8  
9  
10  
11  
12  
13  
14  
15  
16  
17  
18  
19  
20  
21  
22  
23  
24  
25  
26  
27  
28

### **Insomnia and early incident atrial fibrillation:**

#### **A 16-year cohort study of younger men and women Veterans**

Allison E. GAFFEY, PhD<sup>a,b\*</sup>; Lindsey ROSMAN, PhD<sup>c</sup>; Rachel LAMPERT, MD<sup>b</sup>;

Henry K. YAGGI, MD<sup>a,d</sup>; Sally G. HASKELL, MD, MS<sup>a,e</sup>;

Cynthia A. BRANDT, MD; MPH<sup>a,f,g</sup>, Alan D. ENRIQUEZ, MD,<sup>a,b</sup>

Anthony J. MAZZELLA, MD<sup>c</sup>; Matthew M. BURG, PhD<sup>a,b,h</sup>

<sup>a</sup>VA Connecticut Healthcare System, West Haven, CT

<sup>b</sup>Department of Internal Medicine (Cardiovascular Medicine), Yale School of Medicine, New Haven, CT

<sup>c</sup>Division of Cardiology, Department of Medicine, University of North Carolina, Chapel Hill, Chapel Hill, NC

<sup>d</sup>Department of Medicine, Yale School of Medicine

<sup>e</sup>Department of Internal Medicine (General Medicine), Yale School of Medicine

<sup>f</sup>Department of Emergency Medicine, Yale School of Medicine

<sup>g</sup>Yale Center for Medical Informatics, Yale School of Medicine

<sup>h</sup>Department of Anesthesiology, Yale School of Medicine

SHORT TITLE: Insomnia and early atrial fibrillation

#### **Corresponding Author:**

Yale School of Medicine

333 Cedar Street, New Haven, CT 06510

Phone: 203-932-5711, ext.3332, Fax: 203-937-3884, [allison.gaffey@yale.edu](mailto:allison.gaffey@yale.edu)

**Word Count:** 6188, **Tables:** 2, **Figures:** 1; **Abstract Word Count:** 250/250 words

## INSOMNIA AND EARLY ATRIAL FIBRILLATION

### 1 **Abstract**

2 **Background:** There is growing consideration of sleep disturbances and disorders in early  
3 cardiovascular risk, including atrial fibrillation (AF). Obstructive sleep apnea (OSA) confers risk  
4 for AF but is highly comorbid with insomnia, another common sleep disorder. The objectives of  
5 this investigation were first to determine the association of insomnia and early incident AF risk  
6 and second, to determine if AF onset is earlier among those with insomnia.

7 **Methods:** This retrospective analysis used electronic health records from a cohort study of U.S.  
8 Veterans who were discharged from military service as of October 1, 2001 (i.e., post-9/11) and  
9 received Veterans Health Administration (VA) healthcare, 2001-2017. Time-varying,  
10 multivariate Cox proportional hazard models were used to examine the independent contribution  
11 of insomnia diagnosis to AF incidence while serially adjusting for demographics, lifestyle  
12 factors, clinical comorbidities including OSA, psychiatric disorders, and healthcare utilization.

13 **Results:** Overall, 1,063,723 post-9/11 Veterans (*Mean*=28.2 years, 12% women) were followed  
14 for 10 years on average. There were 4168 cases of AF (0.42/1000 person-years). Insomnia was  
15 associated with a 32% greater, adjusted risk of AF (95% CI, 1.21-1.43), and Veterans with  
16 insomnia showed AF onset up to two years earlier. Insomnia-AF associations were similar after  
17 accounting for healthcare utilization, excluding Veterans with OSA, and among those with a  
18 sleep study (adjusted hazard ratios [aHR]: 1.29-1.34).

19 **Conclusions:** In younger adults, insomnia was independently associated with incident AF even  
20 when accounting for OSA. Additional studies should determine if this association differs by sex  
21 and if behavioral or pharmacological treatment for insomnia attenuates AF risk.

22 **Keywords:** atrial fibrillation; insomnia; risk factors; sleep; Veterans; young adults

23

## INSOMNIA AND EARLY ATRIAL FIBRILLATION

### 1 **Clinical Perspective**

#### 2 **1. What is new?**

- 3 • In more than one million younger men and women Veterans with 16 years of  
4 follow-up, a history of insomnia conferred a 32% increase in risk for atrial  
5 fibrillation (AF).
- 6 • The insomnia-AF association persisted despite accounting for obstructive sleep  
7 apnea, a well-known risk factor for AF, and other demographic, lifestyle, and  
8 clinical factors.
- 9 • Veterans with insomnia may also present with AF up to 2 years earlier compared  
10 to those without insomnia.

#### 11 **2. What are the clinical implications?**

- 12 • Insomnia is a potentially modifiable risk factor for AF and sleep should be a focus  
13 for AF prevention.
- 14 • Screening and referral for insomnia and other sleep symptoms is critical,  
15 particularly among patients with an elevated risk for cardiovascular disease, as  
16 observed in the Veteran population.
- 17 • Although sex-specific associations could not be examined, insomnia is more  
18 prevalent among women, and it is possible that insomnia-AF associations may  
19 differ by sex.

20

## INSOMNIA AND EARLY ATRIAL FIBRILLATION

### 1 **Nonstandard Abbreviations and Acronyms**

|    |                 |                                                                    |
|----|-----------------|--------------------------------------------------------------------|
| 2  | AF              | atrial fibrillation                                                |
| 3  | aHR             | adjusted hazard ratio                                              |
| 4  | CAD             | coronary artery disease                                            |
| 5  | CBT-I           | cognitive behavioral therapy for insomnia                          |
| 6  | CHF             | congestive heart failure                                           |
| 7  | CPAP            | continuous positive airway pressure                                |
| 8  | GAD             | generalized anxiety disorder                                       |
| 9  | ICD-9-CM and 10 | International Classification of Diseases, Ninth Revision, Clinical |
| 10 |                 | Modification and Tenth Revision                                    |
| 11 | MDD             | major depressive disorder                                          |
| 12 | MI              | myocardial infarction                                              |
| 13 | OSA             | obstructive sleep apnea                                            |
| 14 | PTSD            | posttraumatic stress disorder                                      |
| 15 | VA              | Veterans Affairs medical center                                    |

## INSOMNIA AND EARLY ATRIAL FIBRILLATION

### 1 **Introduction**

2 Atrial fibrillation (AF) is the most prevalent sustained arrhythmia and is associated with an  
3 increased risk of major adverse cardiovascular events, related mortality, and impaired quality of  
4 life.<sup>1</sup> Yet, AF typically presents after age 60.<sup>1</sup> Compared to AF diagnosed later in life, the  
5 occurrence of AF in younger adults leads to a greater lifelong treatment and financial burden<sup>2</sup>  
6 and a higher associated risk of mortality.<sup>3</sup> Improving AF prevention and associated  
7 cardiovascular risk mitigation among younger adults requires identifying and understanding the  
8 confluence of modifiable behavioral (e.g., obesity, smoking, substance use) and cardiovascular  
9 factors (e.g., high blood pressure, diabetes) that contribute to the early onset of AF.<sup>4-6</sup>

10 In 2022 the American Heart Association added sleep as an essential component of cardiovascular  
11 health,<sup>7</sup> and a recent National Heart, Lung, and Blood Institute report highlighted understanding  
12 sleep disturbances and disorders as an area of scientific priority to inform AF prevention.<sup>8</sup>

13 Obstructive sleep apnea (OSA), a prevalent sleep disorder, is prominently associated with risk  
14 for AF.<sup>9</sup> Insomnia is another common sleep disorder, including among younger adults,<sup>10,28</sup>  
15 defined as difficulty falling or staying asleep, which may result in daytime fatigue and  
16 dysfunction.<sup>11</sup> Strong observational evidence shows that insomnia is associated with risk for  
17 various cardiovascular diseases.<sup>12</sup> Insomnia may be associated with risk for AF, but studies have  
18 been limited by reliance on cross-sectional or self-report data, failing to address OSA, or only  
19 focusing on older adults.<sup>13-17</sup>

20 Veterans are more vulnerable to developing insomnia than non-Veterans,<sup>18</sup> and are thereby a  
21 population of interest for understanding the potential risk associated with AF. This investigation  
22 utilized data from a nationwide cohort of 1.1 million young and middle-aged U.S. Veterans who  
23 were discharged from military service since the 9/11 terrorist attacks. The primary objective was

## INSOMNIA AND EARLY ATRIAL FIBRILLATION

1 to determine the independent association of an insomnia diagnosis to risk for incident AF. We  
2 hypothesized that insomnia would be associated with an increased risk of developing early AF  
3 after controlling for OSA and other lifestyle and clinical risk factors. We also explored if AF  
4 would occur at a younger age among those with insomnia.

### 5 **Methods**

#### 6 Patient Population and Data Sources

7 Data were obtained from the U.S. Department of Defense's Manpower Data Center, which  
8 includes records from individuals who served in support of post-9/11 operations and enrolled in  
9 Veterans Affairs medical center (VA) care after their discharge ( $N = 1,063,723$ ). Records were  
10 merged with administrative, diagnostic, and pharmacy data, including outpatient encounters and  
11 inpatient hospitalizations (*International Classification of Diseases, Ninth Revision, Clinical*  
12 *Modification and Tenth Revision [ICD-9-CM and 10]* codes and dates), from the VA Corporate  
13 Data Warehouse.<sup>19</sup> Veterans with at least 2 clinical encounters at a VA facility from 10/1/01 to  
14 12/31/17 and no history of AF at their first VA encounter were included. EHR diagnoses were  
15 included if an ICD-9-CM or 10 code was recorded during 1 inpatient or  $\geq 2$  outpatient encounters  
16 prior to the first evidence of AF. Waiver of informed consent and procedures were approved by  
17 the VA Connecticut Healthcare System Institutional Review Board. As VA records are  
18 proprietary to the U.S. Government, the data are unavailable.

#### 19 *Primary Exposure: Insomnia Diagnosis*

20 Insomnia diagnoses were identified based on ICD-9-CM or 10 codes during follow-up (e.g.,  
21 307.x; 780.51, 780.52; F51.x; G47.x).<sup>19</sup>

#### 22 *Outcome Ascertainment: Incident AF*

## INSOMNIA AND EARLY ATRIAL FIBRILLATION

1 The primary outcome was a new diagnosis of AF, defined as an ICD-9-CM or 10 code (e.g.,  
2 427.x, I48.x) documented in VA encounters. Consistent with VA diagnostic procedures, AF  
3 diagnoses were validated based on  $\geq 1$  inpatient or outpatient Current Procedural Terminology  
4 (CPT) code indicating assessment for AF with an electrocardiogram (93000, 93005, 93010),  
5 traditional Holter (24-48 h; 93224, 93225, 93226, 93227), extended Holter ( $>48$  h-21 day;  
6 0295T, 0296T, 0297T, 0298T), or an event monitor (93268, 93270, 93271, 93272, 93228,  
7 93229) within 8 weeks before an AF diagnosis. Data concerning AF duration were unavailable,  
8 and distinctions between paroxysmal, persistent, or permanent AF could not be made.

### 9 *Other Risk Factors for AF*

10 Other relevant variables included demographics (age, sex, race/ethnicity [Black, Hispanic,  
11 White, Other (American Indian or Alaska Native; Asian; Native Hawaiian or Other Pacific  
12 Islander, mixed race, declined, or unknown)], and lifestyle factors (obesity [body mass index  
13 (BMI)  $\geq 30$  kg/m<sup>2</sup>],<sup>20</sup> and smoking status [current, former, never]). Validated ICD-9-CM and 10  
14 codes were used to identify diagnoses of alcohol abuse, drug use (aggregated from use of  
15 cocaine, opioids, sedative/hypnotics, other drugs, or polysubstance use), OSA, hypertension,  
16 lipid disorders, diabetes, congestive heart failure (CHF), coronary artery disease (CAD),  
17 myocardial infarction (MI), major depressive disorder (MDD), generalized anxiety disorder  
18 (GAD), and posttraumatic stress disorder (PTSD).<sup>21</sup> Given the high multicollinearity between  
19 psychiatric comorbidities,<sup>22</sup> a composite variable was created from the presence of either GAD,  
20 MDD, or PTSD, with time to event based on the first diagnosis. For sensitivity analyses, CPT  
21 codes were used to identify individuals who were prescribed a continuous positive airway  
22 pressure (i.e., CPAP) device and with a history of a sleep study (e.g., 95800, 95801, 95805,  
23 95806, G0399, G0400), to better categorize those with OSA.

## INSOMNIA AND EARLY ATRIAL FIBRILLATION

1 Prescription data for antihypertensives (e.g., angiotensin-converting enzyme inhibitors,  
2 angiotensin receptor blockers, beta-blockers), stimulants (i.e., amphetamines, methylphenidate),  
3 and medications used to manage sleep (e.g., estazolam, eszopiclone, melatonin, trazodone) were  
4 obtained from VA pharmacy records to reflect relevant medication use. Healthcare utilization  
5 was defined as total primary care visits during the first 2 years of VA care.<sup>19</sup>

### 6 Statistical Analysis

7 SAS V9.4 (Cary, North Carolina, USA) was used for analyses, with  $p < 0.05$  (two-tailed)  
8 indicating statistical significance. Baseline was the date of a Veteran's first VA clinical  
9 encounter. Follow-up time extended from the date of the first clinical encounter until whichever  
10 occurred first: an AF diagnosis or the date of data censoring (last VA encounter) and was  
11 assessed individually. After Veterans met criteria for AF, further diagnoses and prescriptions  
12 were excluded.

13 Machine-learning clinical algorithms that include objective variables (e.g., age, sex, BMI,  
14 comorbidities) can better predict OSA than subjective data from questionnaires. One such  
15 algorithm developed by Ustun et al.,<sup>23</sup> was used to determine patients who might have  
16 undiagnosed OSA. Algorithm scores were calculated based on age, BMI, diabetes, hypertension,  
17 smoking status, and female sex category. Individuals who scored  $>29$  were predicted to have  
18 OSA and were included in the OSA group in secondary analyses, whereas the primary analyses  
19 only used those with ICD-9-CM and 10 diagnoses of OSA. Cumulative incidence rates of AF per  
20 1,000 person-years were calculated. Kaplan-Meier cumulative incidence functions were used to  
21 display AF incidence across follow-up, stratified by the presence of an insomnia diagnosis.



## INSOMNIA AND EARLY ATRIAL FIBRILLATION

1 Time-varying Cox proportional-hazards models with 95% confidence intervals (CIs) were used  
2 to evaluate the unadjusted independent association of insomnia and risk for AF. Four additional  
3 multivariate models then sequentially adjusted for the following *a priori* covariates: 1)  
4 demographics (age, sex [female as reference], race/ethnicity [White as reference]); 2) modifiable  
5 lifestyle and health factors (BMI, smoking status [“Never smoked” as reference], illicit drug use,  
6 and alcohol abuse); 3) clinical risk factors (e.g., OSA, hypertension), and 4) psychiatric  
7 comorbidities (GAD, MDD, and PTSD). Given the time-dependent associations between  
8 insomnia, AF, and other diagnoses (e.g., diabetes, MDD), these variables were modeled as time-  
9 varying, with each variable coded as 0 prior to, and 1 following, the diagnosis date. We excluded  
10 clinical diagnoses after the index AF event. Log-rank tests were used to determine if the time to  
11 event differed by an insomnia diagnosis. Finally, sensitivity analyses assessed for surveillance  
12 bias based on healthcare utilization, OSA, and sleep study participation.

13 To compensate for missing data (i.e., BMI: 22%, healthcare utilization: 12%, smoking status:  
14 26%), regression-based multiple imputation was used to generate 5 data sets with complete  
15 values. Analysis of Schoenfeld residuals indicated no violation of the proportional hazards  
16 assumption.

### 17 **Results**

18 Table 1 illustrates the sample of 1,063,723 Veterans, with characteristics presented overall and  
19 by insomnia diagnosis. The average age at baseline was 28.2 (SD:8.8) years. Most Veterans were  
20 male (87%), White (65%), and non-Hispanic (89%), almost half were married (45%), and a  
21 majority had served in active duty (61%). Approximately 11% of the cohort were diagnosed with  
22 insomnia, a quarter were categorized as obese (26%), and more than half (60%) were past or

## INSOMNIA AND EARLY ATRIAL FIBRILLATION

1 current smokers. The most prevalent clinical and psychiatric diagnoses were lipid disorders  
2 (18%) and PTSD (27%). About 6% of the cohort had undergone a sleep study.

3 An OSA diagnosis was recorded for 10% of Veterans, and there was a significantly higher  
4 prevalence of OSA among those with an insomnia diagnosis than those without. Based on the  
5 clinical prediction algorithm,<sup>23</sup> 15% of those without an OSA diagnosis in the EHR were likely  
6 to have OSA. When comparing the groups of those with diagnosed OSA versus predicted OSA,  
7 the clinical prediction tool had a sensitivity of 80.4%, and a specificity of 51.6%.

8 Overall, there were 4168 cases of AF (4.1% were observed in women). The likelihood of AF was  
9 0.42 events/1,000-person-years. For those with an insomnia diagnosis, the likelihood of AF was  
10 0.57 compared to 0.39 for those without a diagnosis (Figure 1). For men with insomnia the  
11 prevalence of AF was 0.53% and for women with insomnia the prevalence of AF was 0.18%.

12 In the unadjusted Cox model, individuals with insomnia showed a 62% greater risk of incident  
13 AF versus those without insomnia (95% CI, 1.50-1.74;  $p < 0.001$ ; Table 2). The insomnia-AF  
14 association was robust to adjustment for demographics, lifestyle factors, clinical factors  
15 including OSA, and psychiatric diagnoses (adjusted hazard ratio [aHR], 1.32; 95% CI, 1.21-1.43;  
16  $p < 0.001$ ). Those with insomnia were also more likely to be diagnosed with alcohol abuse, OSA,  
17 hypertension, diabetes, CAD, CHF, and a psychiatric disorder during follow-up. AF was  
18 diagnosed at a slightly earlier age among those with insomnia compared to those without (45.09  
19 years vs. 46.14 years,  $F(1,4165)=4.74$ ,  $p=0.030$ ). After excluding anyone with an OSA  
20 diagnosis, those with a history of insomnia again developed AF at a younger age (42.8 versus  
21 45.1 years;  $F(1,2662)=12.14$ ,  $p < 0.001$ ).

## INSOMNIA AND EARLY ATRIAL FIBRILLATION

1 The primary analyses were repeated in five sensitivity analyses. In each case, the significant,  
2 independent association of insomnia remained. First, healthcare utilization was added to the fully  
3 adjusted model. Although there was a significant association of primary care utilization on AF  
4 risk (aHR, 1.01; 95% CI, 1.00-1.30), the insomnia-AF association was robust to adjustment  
5 (aHR, 1.27; 95% CI, 1.17-1.39). Next, to further address the possibility of an association of OSA,  
6 individuals with an OSA diagnosis or with predicted OSA based on the clinical algorithm were  
7 excluded from the analytic sample (*Supplemental Tables S1 and S2*). Next, only investigating  
8 adults who had completed a sleep study ( $n=73,924$ ), including those with diagnosed or predicted  
9 OSA (*Supplemental Table S3*). Analyses were also repeated for individuals who participated in a  
10 sleep study but who were unlikely to have OSA (diagnosed or predicted; *Supplemental Table*  
11 *S4*).

### Discussion

12  
13 Insomnia was diagnosed in 11% of this nationwide cohort of younger military Veterans, and  
14 those with an insomnia diagnosis showed a 32% greater risk of incident AF, supporting our  
15 hypothesis. Age, male sex, BMI, a history of alcohol abuse, OSA, hypertension, CAD, CHF, and  
16 a psychiatric disorder were also associated with significantly increased AF risk, but the  
17 insomnia-AF association remained after controlling for these factors. Adults with insomnia show  
18 a higher prevalence of AF,<sup>24</sup> and there are cross-sectional and prospective associations between  
19 insomnia and AF.<sup>6,13,17,25</sup> But past studies were limited to substantially older samples (e.g., mean  
20 ages of 49 and  $\geq 60$  at baseline),<sup>17,24</sup> did not include validated cases of AF,<sup>6,17,24,25</sup> or adjust for  
21 BMI,<sup>17</sup> OSA,<sup>13</sup> smoking or alcohol abuse.<sup>6</sup> The most compelling investigation of insomnia and  
22 AF was based on EHR data from 14 million California residents with an average age of 49 years,  
23 in which an insomnia diagnosis was associated with a 36% greater risk of incident AF over 4

## INSOMNIA AND EARLY ATRIAL FIBRILLATION

1 years.<sup>17</sup> Yet, the California sample was considerably older than our cohort. In addition to  
2 replicating insomnia-AF associations in younger adults, we demonstrated that individuals with  
3 insomnia presented with AF at a younger age than those without an insomnia diagnosis.  
4 With considerable comorbidity between insomnia and OSA,<sup>26</sup> a strength of the present  
5 investigation was the rigorous methods to exclude the possibility that the insomnia association  
6 did not simply reflect OSA, a known risk factor for AF.<sup>9</sup> OSA was first included as a covariate in  
7 the primary analyses to perform traditional statistical adjustment. The primary analyses were  
8 repeated after excluding individuals with an OSA diagnosis, and also after excluding those with  
9 likely undiagnosed OSA, based on a clinical prediction algorithm.<sup>23</sup> In each case, the significant  
10 association of insomnia was preserved. Although past analyses concerning insomnia and risk of  
11 incident AF also attempted to control for OSA,<sup>6,17,25</sup> those studies did not distill individuals with  
12 diagnosed, treated, and *likely* yet undiagnosed OSA. Efforts to carefully rule out additional  
13 adverse sleep phenomenon and diagnoses are recommended for subsequent work to determine  
14 the unique role of insomnia in early cardiovascular risk.  
15 Additional dimensions of disturbed sleep – e.g., sleep quality and duration – are also associated  
16 with the risk of AF and other arrhythmias.<sup>14-17,25,27,28</sup> Most prominently, sleep duration – either  
17 shorter or longer than the recommended 7-8 hours – is associated with incident AF.<sup>28-30</sup> Risk for  
18 incident AF may also vary based on the combination of adverse sleep symptoms. One meta-  
19 analysis of 14 million patients showed that self-report of *both* insomnia and frequent nighttime  
20 awakening was associated with a 30% higher risk of AF.<sup>25</sup> Further, there are well-known age-  
21 specific patterns of insomnia – i.e., younger adults are more likely to show difficulty with sleep  
22 initiation than with nighttime wakefulness.<sup>31</sup> Although data concerning specific insomnia  
23 symptoms were unavailable, and other aspects of sleep (e.g., chronotype and daytime fatigue)

## INSOMNIA AND EARLY ATRIAL FIBRILLATION

1 and the associations of insomnia were not assessed, such data could help to better characterize  
2 subgroups who are more (or less) vulnerable to AF.<sup>16</sup> Finally, night-to-night variability – in sleep  
3 timing, duration, and efficiency – is another important aspect of sleep health and cardiovascular  
4 risk,<sup>32,33</sup> that should be investigated in relation to AF and other arrhythmias.

### 5 Clinical Implications

6 The high prevalence of insomnia in younger adults – 1 in 5<sup>10,34</sup> – and the impact of AF on quality  
7 of life, medical morbidity and mortality, emphasize the importance of these findings for  
8 identifying sleep as a potentially modifiable risk factor. Specifically, the association of insomnia  
9 to AF risk was greater than those of other known AF risk factors (e.g., obesity, alcohol  
10 abuse),<sup>35,36</sup> and conditions that are highly comorbid with insomnia (i.e., MDD, GAD, PTSD),<sup>37</sup>  
11 suggesting that sleep should be a focus for AF prevention. Evidence supports the benefits of  
12 cognitive behavioral therapy for insomnia (CBT-I) that is comorbid with OSA and psychiatric  
13 conditions.<sup>38-41</sup> CBT-I is also efficacious when offered to adults with a high risk for  
14 cardiovascular disease.<sup>42-45</sup> Whether treating insomnia – with medication, CBT-I, or a  
15 combination – influences risk for AF is an important future focus.<sup>46</sup>

### 16 Potential Pathophysiological Mechanisms Between Insomnia and AF

17 The pathophysiology linking insomnia to AF risk is not well described. One explanation relates  
18 to the potential role of psychosocial stress. For example, stress and negative emotions reported  
19 via daily diary were associated with a 2.5-fold increased likelihood of an AF episode captured  
20 with 24-h Holter monitoring.<sup>47</sup> Stress could be a confounder that is associated with both  
21 insomnia and AF, or a precursor to further stress, autonomic nervous system dysfunction, and  
22 AF.<sup>48</sup> Another hypothesis is that sleep fragmentation and hyperarousal, which are primary  
23 characteristics of insomnia,<sup>11</sup> affect autonomic nervous system regulation (e.g., reducing heart

## INSOMNIA AND EARLY ATRIAL FIBRILLATION

1 rate variability),<sup>49,50</sup> contributing to arrhythmia risk.<sup>51</sup> In a recent study of young adults,  
2 individuals with insomnia, including frequent nighttime waking, displayed a lower wake-to-sleep  
3 reduction in heart rate than those without insomnia.<sup>52</sup> Insomnia-associated alterations in the  
4 renin-aldosterone-angiotensin system, which is promotes atrial remodeling, have also been  
5 proposed,<sup>53,54</sup> along with inflammation, endocrinological and/or adrenergic dysfunction,<sup>55</sup> all of  
6 which are well-described potential mediators of AF risk.<sup>56-58</sup> Other data from the UK Biobank  
7 showed that genetically-predicted insomnia is associated with a 13% higher risk of AF, and risk  
8 for eight other cardiovascular diseases.<sup>59</sup> Finally, hypothalamic-pituitary-adrenal axis activity  
9 may also be involved in the physiologic pathways that are impacted by chronic sleep disruption  
10 but remains understudied.<sup>60</sup> Testing of multi-system physiological markers is likely required to  
11 better explain the complex, downstream associations of insomnia on atrial rhythm.

### 12 Strengths and Limitations

13 Strengths of this investigation include the cohort characteristics (e.g., a large, nationwide sample  
14 with a younger average age), the 10-year average duration of follow-up, and the ability to  
15 analytically control for diagnoses that are frequently comorbid with insomnia (e.g., OSA,  
16 PTSD). There are also limitations. First, this cohort consisted of primarily younger, male, post-  
17 9/11 Veterans and results may not generalize to older Veterans, or adults without a history of  
18 military service. Also related to generalizability, insomnia is more prevalent among younger  
19 women than men,<sup>10</sup> a difference observed in middle-aged and older adults as well.<sup>61</sup> Sex  
20 differences in the association between insomnia and incident AF are plausible,<sup>62</sup> but with only  
21 4% of AF cases diagnosed among women, there was insufficient statistical power to investigate  
22 this question. Exploring sex differences and sex-specific associations of insomnia and AF  
23 associations is a major future direction. Second, using administrative data to capture diagnoses of

## INSOMNIA AND EARLY ATRIAL FIBRILLATION

1 insomnia and incident AF involves selecting for subsets of patients who present to the health  
2 system and whose diagnoses are identifiable. Regrettably, insomnia is likely drastically  
3 underdiagnosed, including among younger Veterans.<sup>63</sup> Similarly, there are patients with minimal  
4 AF burden who are highly symptomatic, while others have a high burden of AF (or persistent  
5 AF) who are asymptomatic. In all cases, diagnostic codes may identify the patients who are most  
6 likely to be symptomatic. Third, a propensity toward somatization or sensitivity to physical  
7 symptoms could be a potential confounding factor,<sup>64</sup> and the true association between insomnia  
8 to AF may be more robust. Fourth, classifying OSA with the clinical prediction algorithm  
9 involves the potential for misclassification bias, but the algorithm showed acceptable validity for  
10 our objectives.<sup>23</sup> Finally, prescriptions that were obtained outside of the VA system were  
11 unavailable and thus, not accounted for.

### 12 **Conclusions**

13 Across 16 years, an insomnia diagnosis was associated with over a 30% greater likelihood of AF  
14 in a younger adult sample, exceeding the risk associated with other known behavioral and  
15 clinical risk factors for AF, sleep and psychiatric conditions that are comorbid with insomnia,  
16 and even after removing potential impacts of OSA. These findings suggest that insomnia is a  
17 potentially modifiable risk factor for AF, pointing the way toward intervention trials to decrease  
18 the incidence of this disease.

19

## INSOMNIA AND EARLY ATRIAL FIBRILLATION

### 1 **Acknowledgements**

2 The authors are grateful to all Veterans for their service and sacrifices, and especially thank the  
3 men and women who participated in the Women Veterans Cohort Study for their contribution to  
4 this work.

### 5 **Disclaimer**

6 The views expressed in this manuscript are those of the authors and do not necessarily represent  
7 the views of the National Heart, Lung, and Blood Institute; the National Institutes of Health; the  
8 U.S. Department of Health and Human Services; or the U.S. Department of Veterans Affairs.

### 9 **Conflict of Interest Disclosures**

10 Dr. Rosman is a consultant with Pfizer and a member of the Biotronik medical advisory board.  
11 All other authors have reported that they have no relationships relevant to the contents of this  
12 paper to disclose.

### 13 **Supplemental Material**

14 Tables S1-S4

15



## INSOMNIA AND EARLY ATRIAL FIBRILLATION

### References

- 1  
2 1. Kornej J, Börschel CS, Benjamin EJ, Schnabel RB. Epidemiology of atrial fibrillation in  
3 the 21st century: novel methods and new insights. *Circulation research*. 2020;127(1):4-  
4 20.
- 5 2. Shah J, Kumar A, Majmundar M, et al. Prevalence of cardiovascular risk factors and  
6 financial burden in younger adults hospitalized with atrial fibrillation. *Heart & Lung*.  
7 2020;49(4):393-397.
- 8 3. Lee E, Choi E-K, Han K-D, et al. Mortality and causes of death in patients with atrial  
9 fibrillation: a nationwide population-based study. *PLoS One*. 2018;13(12):e0209687.
- 10 4. Gourraud J-B, Khairy P, Abadir S, et al. Atrial fibrillation in young patients. *Expert*  
11 *Review of Cardiovascular Therapy*. 2018;16(7):489-500.
- 12 5. Kim YG, Han K-D, Choi J-I, et al. Non-genetic risk factors for atrial fibrillation are  
13 equally important in both young and old age: A nationwide population-based study.  
14 *European journal of preventive cardiology*. 2021;28(6):666-676.
- 15 6. Lee S-R, Han K-D, Choi E-K, Ahn H-J, Oh S, Lip GY. Risk of Atrial Fibrillation in  
16 Young Adults With Isolated Diastolic, Isolated Systolic, and Systolic-Diastolic  
17 Hypertension. *Hypertension*. 2021;78(5):1248-1258.
- 18 7. Lloyd-Jones DM, Allen NB, Anderson CA, et al. Life's essential 8: updating and  
19 enhancing the American Heart Association's construct of cardiovascular health: a  
20 presidential advisory from the American Heart Association. *Circulation*.  
21 2022;146(5):e18-e43.
- 22 8. Benjamin EJ, Al-Khatib SM, Desvigne-Nickens P, et al. Research priorities in the  
23 secondary prevention of atrial fibrillation: A national heart, lung, and blood institute  
24 virtual workshop report. *Am Heart Assoc*; 2021.

## INSOMNIA AND EARLY ATRIAL FIBRILLATION

- 1 9. Youssef I, Kamran H, Yacoub M, et al. Obstructive sleep apnea as a risk factor for atrial  
2 fibrillation: a meta-analysis. *Journal of sleep disorders & therapy*. 2018;7(1).
- 3 10. Buysse DJ, Angst J, Gamma A, Ajdacic V, Eich D, Rössler W. Prevalence, course, and  
4 comorbidity of insomnia and depression in young adults. *Sleep*. 2008;31(4):473-480.
- 5 11. Morin CM, Jarrin DC. Epidemiology of Insomnia: Prevalence, Course, Risk Factors, and  
6 Public Health Burden. *Sleep Medicine Clinics*. 2022.
- 7 12. Javaheri S, Redline S. Insomnia and risk of cardiovascular disease. *Chest*.  
8 2017;152(2):435-444.
- 9 13. Han X, Yang Y, Chen Y, et al. Association between insomnia and atrial fibrillation in a  
10 Chinese population: a cross-sectional study. *Clinical cardiology*. 2017;40(9):765-769.
- 11 14. Hsieh CG, Martin JL. Short sleep, insomnia, and cardiovascular disease. *Current sleep  
12 medicine reports*. 2019;5(4):234-242.
- 13 15. Kadish A, Jacobson J. Sleep Patterns and Arrhythmias: Should This Keep Us Awake at  
14 Night? Vol 78: American College of Cardiology Foundation Washington DC;  
15 2021:1208-1209.
- 16 16. Li X, Zhou T, Ma H, et al. Healthy sleep patterns and risk of incident arrhythmias.  
17 *Journal of the American College of Cardiology*. 2021;78(12):1197-1207.
- 18 17. Christensen MA, Dixit S, Dewland TA, et al. Sleep characteristics that predict atrial  
19 fibrillation. *Heart Rhythm*. 2018;15(9):1289-1295.
- 20 18. Colvonen PJ, Almklov E, Tripp JC, Ulmer CS, Pittman JO, Afari N. Prevalence rates and  
21 correlates of insomnia disorder in post-9/11 veterans enrolling in VA healthcare. *Sleep*.  
22 2020;43(12):zsaa119.

## INSOMNIA AND EARLY ATRIAL FIBRILLATION

- 1 19. Gaffey AE, Rosman L, Burg MM, et al. Posttraumatic stress disorder, antidepressant use,  
2 and hemorrhagic stroke in young men and women: a 13-year cohort study. *Stroke*.  
3 2021;52(1):121-129.
- 4 20. Feldmann E, Broderick JP, Kernan WN, et al. Major risk factors for intracerebral  
5 hemorrhage in the young are modifiable. *Stroke*. 2005;36(9):1881-1885.
- 6 21. Rosman L, Lampert R, Ramsey CM, et al. Posttraumatic stress disorder and risk for early  
7 incident atrial fibrillation: a prospective cohort study of 1.1 million young adults. *Journal*  
8 *of the American Heart Association*. 2019;8(19):e013741.
- 9 22. Kaufman J, Charney D. Comorbidity of mood and anxiety disorders. *Depression and*  
10 *anxiety*. 2000;12(S1):69-76.
- 11 23. Ustun B, Westover MB, Rudin C, Bianchi MT. Clinical prediction models for sleep  
12 apnea: the importance of medical history over symptoms. *Journal of Clinical Sleep*  
13 *Medicine*. 2016;12(2):161-168.
- 14 24. Wang Y-M, Song M, Wang R, et al. Insomnia and multimorbidity in the community  
15 elderly in China. *Journal of Clinical Sleep Medicine*. 2017;13(4):591-597.
- 16 25. Chokesuwattanaskul R, Thongprayoon C, Sharma K, Congrete S, Tanawuttiwat T,  
17 Cheungpasitporn W. Associations of sleep quality with incident atrial fibrillation: a meta-  
18 analysis. *Internal Medicine Journal*. 2018;48(8):964-972.
- 19 26. Byrne SP, McCarthy E, DeViva JC, Southwick SM, Pietrzak RH. Prevalence, risk  
20 correlates, and health comorbidities of insomnia in US military veterans: Results from the  
21 2019–2020 National Health and Resilience in Veterans Study. *Journal of Clinical Sleep*  
22 *Medicine*. 2021;17(6):1267-1277.

## INSOMNIA AND EARLY ATRIAL FIBRILLATION

- 1 27. Kwon Y, Gharib SA, Biggs ML, et al. Association of sleep characteristics with atrial  
2 fibrillation: the Multi-Ethnic Study of Atherosclerosis. *Thorax*. 2015;70(9):873-879.
- 3 28. Khawaja O, Sarwar A, Albert CM, Gaziano JM, Djoussé L. Sleep duration and risk of  
4 atrial fibrillation (from the Physicians' Health Study). *The American journal of*  
5 *cardiology*. 2013;111(4):547-551.
- 6 29. Morovatdar N, Ebrahimi N, Rezaee R, Poorzand H, Tork MAB, Sahebkar A. Sleep  
7 duration and risk of atrial fibrillation: a systematic review. *Journal of atrial Fibrillation*.  
8 2019;11(6).
- 9 30. Arafa A, Kokubo Y, Shimamoto K, et al. Sleep duration and atrial fibrillation risk in the  
10 context of predictive, preventive, and personalized medicine: the Suita Study and meta-  
11 analysis of prospective cohort studies. *EPMA Journal*. 2022:1-10.
- 12 31. Ohayon MM, Reynolds III CF. Epidemiological and clinical relevance of insomnia  
13 diagnosis algorithms according to the DSM-IV and the International Classification of  
14 Sleep Disorders (ICSD). *Sleep medicine*. 2009;10(9):952-960.
- 15 32. Makarem N, Zuraikat FM, Aggarwal B, Jelic S, St-Onge M-P. Variability in Sleep  
16 Patterns: an Emerging Risk Factor for Hypertension. *Current Hypertension Reports*.  
17 2020;22(2):1-10.
- 18 33. Chaput J-P, Dutil C, Featherstone R, et al. Sleep timing, sleep consistency, and health in  
19 adults: a systematic review. *Applied Physiology, Nutrition, and Metabolism*.  
20 2020;45(10):S232-S247.
- 21 34. Morphy H, Dunn KM, Lewis M, Boardman HF, Croft PR. Epidemiology of insomnia: a  
22 longitudinal study in a UK population. *Sleep*. 2007;30(3):274-280.

## INSOMNIA AND EARLY ATRIAL FIBRILLATION

- 1 35. Voskoboinik A, Prabhu S, Ling L-h, Kalman JM, Kistler PM. Alcohol and atrial  
2 fibrillation: a sobering review. *Journal of the American College of Cardiology*.  
3 2016;68(23):2567-2576.
- 4 36. Wanahita N, Messerli FH, Bangalore S, Gami AS, Somers VK, Steinberg JS. Atrial  
5 fibrillation and obesity—results of a meta-analysis. *American heart journal*.  
6 2008;155(2):310-315.
- 7 37. Geoffroy PA, Hoertel N, Etain B, et al. Insomnia and hypersomnia in major depressive  
8 episode: prevalence, sociodemographic characteristics and psychiatric comorbidity in a  
9 population-based study. *Journal of affective disorders*. 2018;226:132-141.
- 10 38. Sweetman A, Lack L, Bastien C. Co-morbid insomnia and sleep apnea (COMISA):  
11 prevalence, consequences, methodological considerations, and recent randomized  
12 controlled trials. *Brain Sciences*. 2019;9(12):371.
- 13 39. Ong JC, Crawford MR, Wallace DM. Sleep apnea and insomnia: emerging evidence for  
14 effective clinical management. *Chest*. 2021;159(5):2020-2028.
- 15 40. Wu JQ, Appleman ER, Salazar RD, Ong JC. Cognitive behavioral therapy for insomnia  
16 comorbid with psychiatric and medical conditions: a meta-analysis. *JAMA internal  
17 medicine*. 2015;175(9):1461-1472.
- 18 41. Ulmer CS, Edinger JD, Calhoun PS. A multi-component cognitive-behavioral  
19 intervention for sleep disturbance in veterans with PTSD: a pilot study. *Journal of  
20 Clinical Sleep Medicine*. 2011;7(1):57-68.
- 21 42. Siebmanns S, Johansson P, Ulander M, Johansson L, Andersson G, Broström A. The  
22 effect of nurse-led Internet-based cognitive behavioural therapy for insomnia on patients

## INSOMNIA AND EARLY ATRIAL FIBRILLATION

- 1 with cardiovascular disease: A randomized controlled trial with 6-month follow-up.  
2 *Nursing open*. 2021;8(4):1755-1768.
- 3 43. Redeker NS, Yaggi HK, Jacoby D, et al. Cognitive behavioral therapy for insomnia has  
4 sustained effects on insomnia, fatigue, and function among people with chronic heart  
5 failure and insomnia: the HeartSleep Study. *Sleep*. 2022;45(1):zsab252.
- 6 44. Conley S, Redeker NS. Cognitive behavioral therapy for insomnia in the context of  
7 cardiovascular conditions. *Current sleep medicine reports*. 2015;1(3):157-165.
- 8 45. Redeker NS, Conley S, Anderson G, et al. Effects of cognitive behavioral therapy for  
9 insomnia on sleep, symptoms, stress, and autonomic function among patients with heart  
10 failure. *Behavioral sleep medicine*. 2018.
- 11 46. Sears SF, Anthony S, Harrell R, et al. Managing atrial fibrillation: The intersection of  
12 cardiology, health psychology, and the patient experience. *Health Psychology*. 2021.
- 13 47. Lampert R, Jamner L, Burg M, et al. Triggering of symptomatic atrial fibrillation by  
14 negative emotion. *Journal of the American College of Cardiology*. 2014;64(14):1533-  
15 1534.
- 16 48. Segan L, Prabhu S, Kalman JM, Kistler PM. Atrial Fibrillation and Stress: A 2-Way  
17 Street? *JACC: Clinical Electrophysiology*. 2022.
- 18 49. Nano M-M, Fonseca P, Vullings R, Aarts RM. Measures of cardiovascular autonomic  
19 activity in insomnia disorder: A systematic review. *PloS one*. 2017;12(10):e0186716.
- 20 50. Stein PK, Pu Y. Heart rate variability, sleep and sleep disorders. *Sleep medicine reviews*.  
21 2012;16(1):47-66.

## INSOMNIA AND EARLY ATRIAL FIBRILLATION

- 1 51. Agarwal SK, Norby FL, Whitsel EA, et al. Cardiac autonomic dysfunction and incidence  
2 of atrial fibrillation: results from 20 years follow-up. *Journal of the American College of*  
3 *Cardiology*. 2017;69(3):291-299.
- 4 52. Cosgrave J, Phillips J, Haines R, Foster RG, Steinsaltz D, Wulff K. Revisiting nocturnal  
5 heart rate and heart rate variability in insomnia: A polysomnography-based comparison  
6 of young self-reported good and poor sleepers. *Journal of sleep research*.  
7 2021;30(4):e13278.
- 8 53. Lee H-H, Chen Y-C, Chen J-J, Lo S-H, Guo Y-L, Hu H-Y. Insomnia and the risk of atrial  
9 fibrillation: a population-based cohort study. *Acta Cardiologica Sinica*. 2017;33(2):165.
- 10 54. Grandner MA, Perlis ML. Short sleep duration and insomnia associated with  
11 hypertension incidence. *Hypertension Research*. 2013;36(11):932-933.
- 12 55. Meinhausen C, Prather AA, Sumner JA. Posttraumatic stress disorder (PTSD), sleep, and  
13 cardiovascular disease risk: A mechanism-focused narrative review. *Health Psychology*.  
14 2022.
- 15 56. Aviles RJ, Martin DO, Apperson-Hansen C, et al. Inflammation as a risk factor for atrial  
16 fibrillation. *Circulation*. 2003;108(24):3006-3010.
- 17 57. Aguilar M, Rose RA, Takawale A, Nattel S, Reilly S. New aspects of endocrine control  
18 of atrial fibrillation and possibilities for clinical translation. *Cardiovascular Research*.  
19 2021;117(7):1645-1661.
- 20 58. Workman AJ. Cardiac adrenergic control and atrial fibrillation. *Naunyn-Schmiedeberg's*  
21 *archives of pharmacology*. 2010;381(3):235-249.

## INSOMNIA AND EARLY ATRIAL FIBRILLATION

- 1 59. Liu X, Li C, Sun X, et al. Genetically predicted insomnia in relation to 14 cardiovascular  
2 conditions and 17 Cardiometabolic risk factors: a Mendelian randomization study.  
3 *Journal of the American Heart Association*. 2021;10(15):e020187.
- 4 60. van Dalen JH, Markus CR. The influence of sleep on human hypothalamic–pituitary–  
5 adrenal (HPA) axis reactivity: A systematic review. *Sleep medicine reviews*.  
6 2018;39:187-194.
- 7 61. Suh S, Cho N, Zhang J. Sex differences in insomnia: from epidemiology and etiology to  
8 intervention. *Current psychiatry reports*. 2018;20(9):1-12.
- 9 62. Andrade JG, Deyell MW, Lee AY, Macle L. Sex differences in atrial fibrillation.  
10 *Canadian Journal of Cardiology*. 2018;34(4):429-436.
- 11 63. Albrecht JS, Wickwire EM, Vadlamani A, Scharf SM, Tom SE. Trends in insomnia  
12 diagnosis and treatment among medicare beneficiaries, 2006–2013. *The American*  
13 *Journal of Geriatric Psychiatry*. 2019;27(3):301-309.
- 14 64. Barsky AJ. Palpitations, arrhythmias, and awareness of cardiac activity. *Annals of*  
15 *internal medicine*. 2001;134(9\_Part\_2):832-837.

16  
17



## INSOMNIA AND EARLY ATRIAL FIBRILLATION

### 1 **Figure Legend**

#### 2 **Figure 1. Cumulative Incidence of Atrial Fibrillation (AF) Among Younger Adults by**

3 **Insomnia Diagnosis.** Among a cohort of 1,063,723 post-9/11 Veterans, the cumulative

4 incidence of AF and number of Veterans at risk, is displayed according to the presence and

5 absence of an insomnia diagnosis. Due to a low AF incidence across the earlier years of follow-

6 up, data is depicted as of Year 9.

## INSOMNIA AND EARLY ATRIAL FIBRILLATION

1 **Table 1. Characteristics of the Cohort, Overall and by Insomnia Diagnosis**

|                              | <b>Total</b><br><b>N=1,063,723</b> | <b>Insomnia</b><br><b>n=125,488</b> | <b>No Insomnia</b><br><b>n=1,051,716</b> | <b>p-value</b> |
|------------------------------|------------------------------------|-------------------------------------|------------------------------------------|----------------|
| <b>Demographics</b>          |                                    |                                     |                                          |                |
| Age, at baseline (years)     | 28.20±8.84                         | 28.05±8.77                          | 28.21±8.84                               | <0.001         |
| Women                        | 145,061<br>(12.32)                 | 15,625<br>(12.45)                   | 129,436<br>(12.31)                       | 0.144          |
| Race/Ethnicity               |                                    |                                     |                                          | 0.040          |
| Black                        | 185,571<br>(15.76)                 | 23,184<br>(18.48)                   | 162,387<br>(15.44)                       |                |
| Hispanic                     | 129,365<br>(10.99)                 | 14,788<br>(11.78)                   | 114,577<br>(10.89)                       |                |
| Other/Multiple               | 100,384<br>(8.53)                  | 7,413<br>(5.91)                     | 92,971<br>(8.84)                         |                |
| White                        | 761,884<br>(64.72)                 | 80,103<br>(63.83)                   | 681,781<br>(64.83)                       |                |
| Married, at baseline         | 532,594<br>(45.27)                 | 56,665<br>(45.18)                   | 475,929<br>(45.23)                       | 0.490          |
| ≥High school                 | 1,050,214<br>(98.73)               | 123,656<br>(98.58)                  | 1,038,303<br>(98.75)                     | <0.001         |
| Active duty military service | 712,184<br>(60.50)                 | 72,548<br>(57.81)                   | 639,636<br>(60.82)                       | <0.001         |
| <b>Lifestyle Factors</b>     |                                    |                                     |                                          |                |
| BMI, at baseline             | 28.48±4.42                         | 28.49±4.41                          | 28.48±4.42                               | 0.378          |
| Obese                        | 301,132<br>(25.58)                 | 42,926<br>(34.21)                   | 258,206<br>(24.55)                       | <0.001         |
| Smoking status               |                                    |                                     |                                          | <0.001         |

## INSOMNIA AND EARLY ATRIAL FIBRILLATION

|                   |                    |                   |                    |        |
|-------------------|--------------------|-------------------|--------------------|--------|
| Current           | 127,446<br>(14.21) | 16,116<br>(12.89) | 111,330<br>(14.42) |        |
| Former            | 405,214<br>(45.17) | 63,203<br>(50.55) | 342,011<br>(44.30) |        |
| Never             | 364,432<br>(40.62) | 45,703<br>(36.56) | 318,729<br>(41.28) |        |
| Drug use          | 63,352<br>(5.38)   | 17,582<br>(14.01) | 45,770<br>(4.35)   | <0.001 |
| Alcohol abuse     | 127,890<br>(10.86) | 31,938<br>(25.45) | 95,952<br>(9.12)   | <0.001 |
| Clinical factors* |                    |                   |                    |        |
| OSA               | 113,481<br>(9.64)  | 27,352<br>(21.80) | 86,129<br>(8.19)   | <0.001 |
| Predicted OSA     | 233,219<br>(21.40) | 33,545<br>(30.02) | 199,674<br>(20.42) | <0.001 |
| Hypertension      | 151,892<br>(12.90) | 29,657<br>(23.63) | 122,235<br>(11.62) | <0.001 |
| Lipid disorders   | 211,467<br>(17.96) | 40,372<br>(32.17) | 171,095<br>(16.27) | <0.001 |
| Diabetes          | 62,081<br>(5.27)   | 9,600<br>(7.65)   | 52,481<br>(4.99)   | <0.001 |
| CHF               | 2,212<br>(0.19)    | 480<br>(0.38)     | 1,732<br>(0.16)    | <0.001 |
| CAD               | 10,078<br>(0.86)   | 1,964<br>(1.57)   | 8,114<br>(0.77)    | <0.001 |
| MI                | 702<br>(0.07)      | 140<br>(0.11)     | 562<br>(0.06)      | <0.001 |

## INSOMNIA AND EARLY ATRIAL FIBRILLATION

| Psychiatric history*                |                    |                   |                    |        |
|-------------------------------------|--------------------|-------------------|--------------------|--------|
| Major depressive disorder           | 111,645<br>(9.48)  | 29,916<br>(23.84) | 81,729<br>(7.77)   | <0.001 |
| Generalized anxiety disorder        | 183,680<br>(15.60) | 48,282<br>(38.48) | 135,348<br>(12.87) | <0.001 |
| PTSD                                | 317,177<br>(26.94) | 78,189<br>(62.31) | 238,988<br>(22.72) | <0.001 |
| Medications*                        |                    |                   |                    |        |
| Antihypertensive therapy            | 312,656<br>(26.56) | 47,393<br>(37.77) | 265,263<br>(25.22) | <0.001 |
| Stimulants                          | 38,689<br>(3.29)   | 9,650<br>(7.69)   | 29,039<br>(2.76)   | <0.001 |
| Sleep medications                   | 302,144<br>(25.67) | 99,613<br>(79.38) | 202,531<br>(19.26) | <0.001 |
| History of a sleep study            | 73,924<br>(6.28)   | 20,951<br>(16.70) | 52,973<br>(5.04)   | <0.001 |
| Healthcare utilization <sup>†</sup> | 4.08±4.05          | 5.92±5.64         | 3.82±3.69          | <0.001 |
| Follow-up                           | 9.57±4.04          | 11.40±2.97        | 9.33±4.10          | <0.001 |

1 Data are presented as mean ± SD and N(%).

2 Abbreviations: AF, atrial fibrillation; BP, blood pressure; BMI, body mass index; CAD, coronary  
3 artery disease; CHF, congestive heart failure; MI, myocardial infarction; PTSD, posttraumatic  
4 stress disorder.

5 \*Diagnoses and prescriptions during the follow-up period but prior to the index AF event.

6 <sup>†</sup>Based on 2 years of follow-up after initiating VA care.

**Table 2. Unadjusted and Multivariate Models of Insomnia and Risk for Incident Atrial Fibrillation**

|                                    | Unadjusted  |        | Model 1     |        | Model 2     |        | Model 3     |        | Model 4     |        |
|------------------------------------|-------------|--------|-------------|--------|-------------|--------|-------------|--------|-------------|--------|
| Insomnia                           | 1.62        | <0.001 | 1.74        | <0.001 | 1.54        | <0.001 | 1.35        | <0.001 | 1.32        | <0.001 |
|                                    | (1.50-1.74) |        | (1.61-1.87) |        | (1.42-1.67) |        | (1.25-1.47) |        | (1.21-1.43) |        |
| Demographics                       |             |        |             |        |             |        |             |        |             |        |
| Age                                |             |        | 1.08        | <0.001 | 1.08        | <0.001 | 1.06        | <0.001 | 1.06        | <0.001 |
|                                    |             |        | (1.08-1.08) |        | (1.08-1.08) |        | (1.06-1.07) |        | (1.06-1.07) |        |
| Female                             |             |        | 0.33        | <0.001 | 0.37        | <0.001 | 0.40        | <0.001 | 0.40        | <0.001 |
|                                    |             |        | (0.28-0.39) |        | (0.31-0.43) |        | (0.34-0.47) |        | (0.34-0.47) |        |
| Black                              |             |        | 0.76        | <0.001 | 0.70        | <0.001 | 0.66        | <0.001 | 0.66        | <0.001 |
|                                    |             |        | (0.70-0.82) |        | (0.65-0.76) |        | (0.60-0.71) |        | (0.60-0.71) |        |
| Hispanic                           |             |        | 0.69        | <0.001 | 0.66        | <0.001 | 0.65        | <0.001 | 0.65        | <0.001 |
|                                    |             |        | (0.62-0.77) |        | (0.59-0.74) |        | (0.58-0.73) |        | (0.58-0.72) |        |
| Other                              |             |        | 0.57        | <0.001 | 0.59        | <0.001 | 0.61        | <0.001 | 0.61        | <0.001 |
|                                    |             |        | (0.51-0.64) |        | (0.52-0.66) |        | (0.54-0.69) |        | (0.54-0.69) |        |
| Lifestyle Factors                  |             |        |             |        |             |        |             |        |             |        |
| Obese*                             |             |        |             |        | 1.03        | <0.001 | 1.02        | <0.001 | 1.02        | <0.001 |
|                                    |             |        |             |        | (1.02-1.04) |        | (1.01-1.02) |        | (1.01-1.02) |        |
| Current smoker                     |             |        |             |        | 0.99        | 0.835  | 0.94        | 0.114  | 0.94        | 0.090  |
|                                    |             |        |             |        | (0.92-1.07) |        | (0.88-1.01) |        | (0.88-1.01) |        |
| Former smoker                      |             |        |             |        | 1.03        | 0.527  | 1.00        | 0.971  | 1.00        | 0.982  |
|                                    |             |        |             |        | (0.94-1.12) |        | (0.92-1.09) |        | (0.92-1.09) |        |
| Drug use <sup>†</sup>              |             |        |             |        | 1.21        | 0.005  | 1.12        | 0.079  | 1.11        | 0.134  |
|                                    |             |        |             |        | (1.06-1.38) |        | (0.99-1.28) |        | (0.97-1.26) |        |
| Alcohol abuse <sup>†</sup>         |             |        |             |        | 1.53        | <0.001 | 1.34        | <0.001 | 1.30        | <0.001 |
|                                    |             |        |             |        | (1.40-1.67) |        | (1.22-1.46) |        | (1.18-1.42) |        |
| Medical Comorbidities <sup>†</sup> |             |        |             |        |             |        |             |        |             |        |

INSOMNIA AND EARLY ATRIAL FIBRILLATION

|                                           |                     |        |                     |        |
|-------------------------------------------|---------------------|--------|---------------------|--------|
| OSA                                       | 1.96<br>(1.82-2.11) | <0.001 | 1.93<br>(1.80-2.08) | <0.001 |
| Hypertension                              | 1.55<br>(1.44-1.67) | <0.001 | 1.54<br>(1.43-1.66) | <0.001 |
| Lipid disorders                           | 0.96<br>(0.89-1.03) | 0.268  | 0.95<br>(0.89-1.02) | 0.178  |
| Diabetes                                  | 0.85<br>(0.77-0.94) | 0.002  | 0.85<br>(0.77-0.94) | 0.001  |
| MI                                        | 1.32<br>(0.99-1.78) | 0.063  | 1.34<br>(0.99-1.79) | 0.054  |
| CAD                                       | 2.22<br>(1.99-2.48) | <0.001 | 2.22<br>(1.99-2.47) | <0.001 |
| CHF                                       | 6.30<br>(5.52-7.19) | <0.001 | 6.27<br>(5.49-7.16) | <0.001 |
| Psychiatric<br>Comorbidities <sup>†</sup> |                     |        |                     |        |
| GAD/MDD/PTSD                              |                     |        | 1.13<br>(1.05-1.21) | <0.001 |

7 Abbreviations: CAD, coronary artery disease; GAD, generalized anxiety disorder; MDD, major depressive disorder; MI, myocardial  
8 infarction; OSA, obstructive sleep apnea; PTSD, posttraumatic stress disorder.  
9 Hazard ratios, 95% CIs, and *p*-values  
10 Covariates: Model 1, Demographics (age, sex, race/ethnicity); Model 2, Demographics and Lifestyle factors (i.e., obesity, smoking,  
11 drug and alcohol use); Model 3, Demographics, Lifestyle factors, Medical comorbidities (OSA, hypertension, lipid disorders, diabetes,  
12 MI, CAD, CHF), Model 4: Demographics, Lifestyle factors, Medical comorbidities, and Psychiatric comorbidities (GAD, MDD, and  
13 PTSD).  
14 \* $\geq 30$  kg/m<sup>2</sup>  
15 <sup>†</sup>Diagnoses are prior to the index AF criteria and are time dependent.  
16

17 **Figure 1. Cumulative Incidence of Atrial Fibrillation (AF) Among Younger Adults by Insomnia Diagnosis**

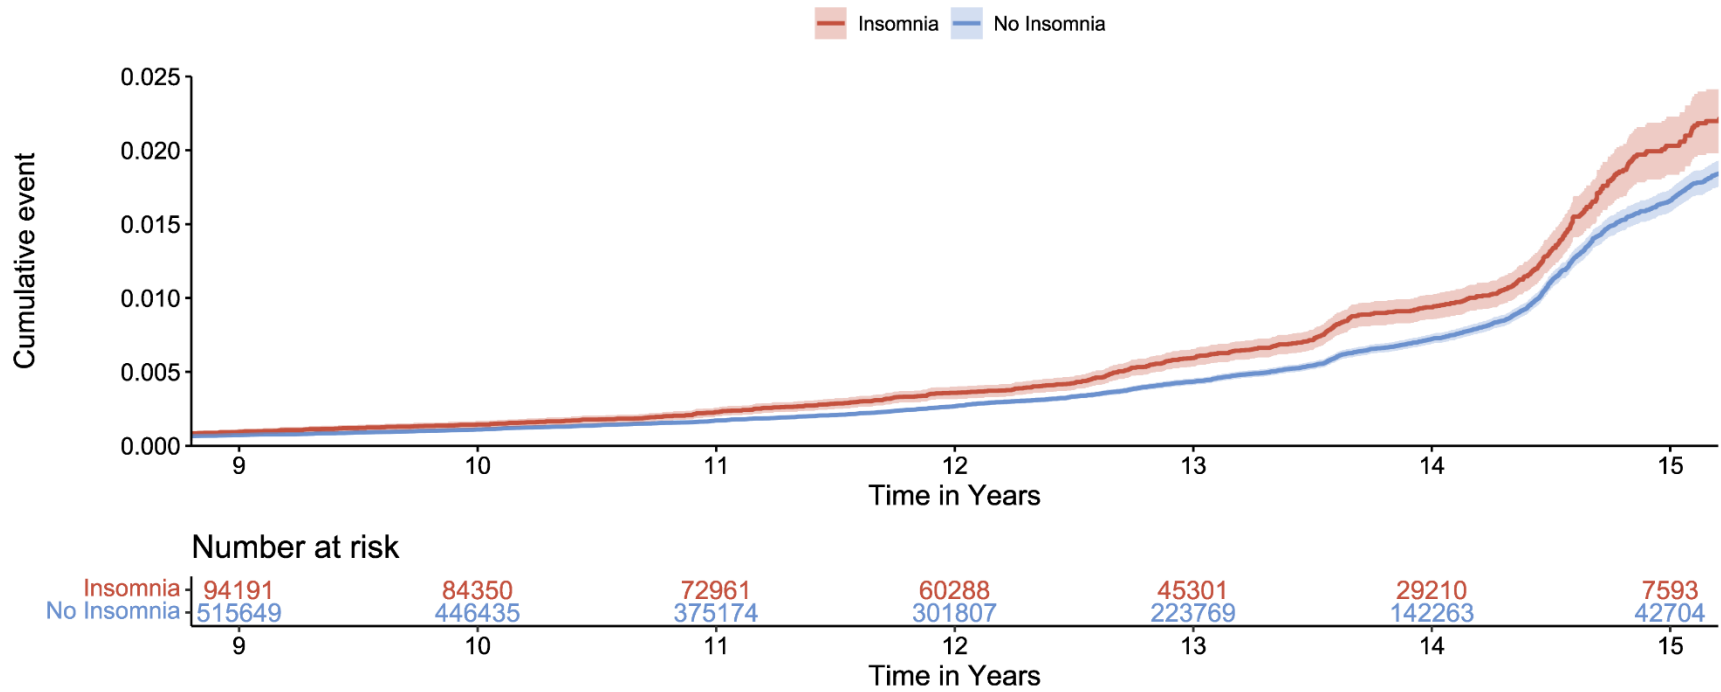

18
